# Supplementary material for: Temporal expression signatures of rare variant-harboring genes linked to autism, bipolar disorder, schizophrenia and epilepsy across neurodevelopment
Source: Research Square preprint supplement (doi:10.21203/rs.3.rs-5184174/v1), 2025-09-30
Supplement: Supplementary file 1 [file 7c8d08bdd348d2a491032690.xlsx]

## Sheet: Title Page
Supplementary Data Files
Temporal expression signatures of rare variant-harboring genes linked to autism, bipolar disorder, schizophrenia and epilepsy across neurodevelopment
Authors:
Kalyani B. Karunakaran1*, Suhas Ganesh1, Ashitha SNM1, Biju Viswanath1*, Meera Purushottam1, Sanjeev Jain1
Affiliations:
1 Molecular Genetics Lab, Department of Psychiatry, National Institute of Mental Health and Neurosciences
*Correspondence to: Kalyani B. Karunakaran (kalyanithepebble@gmail.com) and Biju Viswanath (bijuv1@gmail.com)
This file contains:
o Supplementary Data Files 1 to 4

## Sheet: Supplementary Data File 1
Supplementary Data File 1: List of ASD, BPD, SCZ and EPI genes collected from whole exome-sequencing studies
Gene	ASD	BPD	EPI	SCZ		Syndrome	Consortium	Link to consortium	Reference
ADNP	Yes			Yes		Autism spectrum disorder	Autism Sequencing Consortium	https://asc.broadinstitute.org/downloads	PMID: 23259942
ANKRD11	Yes		Yes			Bipolar disorder	BipEx consortium	https://bipex.broadinstitute.org/downloads	PMID: 35410376
ANKRD12			Yes	Yes		Epilepsy	EPI25 consortium	https://epi25.broadinstitute.org/downloads	PMID: 31327507
ASH1L	Yes			Yes		Schizophrenia	SCHEMA consortium	https://schema.broadinstitute.org/downloads	PMID: 35396579
BTBD16		Yes	Yes
CACNA1B		Yes	Yes
CHD2	Yes		Yes
DYRK1A	Yes		Yes
GIGYF1	Yes	Yes
GRIN2A			Yes	Yes
KDM5B	Yes	Yes	Yes
KDM6B	Yes			Yes
KMT2E	Yes		Yes
NPRL3			Yes	Yes
NR3C2	Yes			Yes
NRXN1	Yes			Yes
RYR2			Yes	Yes
SATB1	Yes			Yes
SCN1A	Yes		Yes
SMG7		Yes		Yes
STXBP1	Yes		Yes
SYNGAP1	Yes		Yes
CHD8	Yes
SCN2A	Yes
FOXP1	Yes
POGZ	Yes
ARID1B	Yes
KMT5B	Yes
SLC6A1	Yes
GRIN2B	Yes
PTEN	Yes
SHANK3	Yes
MED13L	Yes
ANK2	Yes
TLK2	Yes
CTNNB1	Yes
DEAF1	Yes
DSCAM	Yes
SETD5	Yes
KCNQ3	Yes
SRPRA	Yes
WAC	Yes
SHANK2	Yes
TBL1XR1	Yes
DNMT3A	Yes
MYT1L	Yes
BCL11A	Yes
RORB	Yes
RAI1	Yes
DYNC1H1	Yes
DPYSL2	Yes
AP2S1	Yes
KMT2C	Yes
PAX5	Yes
MKX	Yes
GABRB3	Yes
SIN3A	Yes
MBD5	Yes
MAP1A	Yes
CELF4	Yes
PHF12	Yes
TBR1	Yes
PPP2R5D	Yes
TM9SF4	Yes
PHF21A	Yes
PRR12	Yes
SKI	Yes
ASXL3	Yes
SPAST	Yes
SMARCC2	Yes
TRIP12	Yes
CREBBP	Yes
TCF4	Yes
CACNA1E	Yes
GNAI1	Yes
TCF20	Yes
FOXP2	Yes
NSD1	Yes
TCF7L2	Yes
LDB1	Yes
EIF3G	Yes
PHF2	Yes
KIAA0232	Yes
VEZF1	Yes
GFAP	Yes
IRF2BPL	Yes
ZMYND8	Yes
RFX3	Yes
PPP5C	Yes
TRIM23	Yes
TRAF7	Yes
ELAVL3	Yes
GRIA2	Yes
LRRC4C	Yes
CACNA2D3	Yes
NUP155	Yes
NACC1	Yes
PTK7	Yes
PPP1R9B	Yes
GABRB2	Yes
HDLBP	Yes
TAOK1	Yes
UBR1	Yes
TEK	Yes
KCNMA1	Yes
CORO1A	Yes
HECTD4	Yes
TICRR		Yes
THSD7A		Yes
NBPF14		Yes
AXIN1		Yes
NPHP3		Yes
FRMPD2		Yes
PAMR1		Yes
FASTKD1		Yes
CHST13		Yes
SLC4A11		Yes
PYGM		Yes
TNIK		Yes
CENPN		Yes
ATP2A2		Yes
HLCS		Yes
FAM83H		Yes
CFH		Yes
STON1		Yes
ERBB4		Yes
ADAMTS12		Yes
TANC2		Yes
DIP2A		Yes
PFKP		Yes
RIPOR1		Yes
PANX2		Yes
FAM20A		Yes
ZSWIM3		Yes
CRHR2		Yes
TMF1		Yes
HENMT1		Yes
FOXD4		Yes
NIPAL4		Yes
HACE1		Yes
KIAA0586		Yes
IL16		Yes
FAM161B		Yes
NUP160		Yes
FBRS		Yes
ARHGAP5		Yes
ATP2C1		Yes
PHKG1		Yes
PFKM		Yes
TOR3A		Yes
DOCK1		Yes
SLX4		Yes
MYOM1		Yes
MUSK		Yes
NLRP1		Yes
DOP1A		Yes
TOPAZ1		Yes
CYP2A13		Yes
CHRNB2		Yes
CHD1L		Yes
PNKP		Yes
WWP1		Yes
PTCH2		Yes
TET2		Yes
SYDE2		Yes
PABPC4L		Yes
GRK4		Yes
SIDT2		Yes
NEK1		Yes
MYH4		Yes
CFAP65		Yes
TMEM235		Yes
CCL3L3		Yes
PRR22		Yes
SEBOX		Yes
EIF2B5		Yes
SCN3A		Yes
MSH4		Yes
ANKFY1		Yes
TJP3		Yes
HPS5		Yes
ADAM15		Yes
SPIDR		Yes
AGAP9		Yes
MYO1C		Yes
HEATR5A		Yes
COBLL1		Yes
SPECC1		Yes
MTMR2		Yes
PDZD2		Yes
DIAPH1		Yes
LGI4		Yes
IRX6		Yes
ATP8B4		Yes
ALG10		Yes
MINAR1		Yes
CSF3R		Yes
PLXNB1		Yes
N4BP2L2		Yes
PLXNC1		Yes
PPIL2		Yes
ZNF573		Yes
DEPDC5			Yes
NEXMIF			Yes
ROR2			Yes
OMD			Yes
DHX57			Yes
MRPL18			Yes
DPM1			Yes
NPRL2			Yes
MECP2			Yes
KANSL1			Yes
LGI1			Yes
GPAT3			Yes
TRAPPC5			Yes
MYL3			Yes
TTI1			Yes
ALDH4A1			Yes
PCDH19			Yes
NCOA1			Yes
CDKAL1			Yes
HSPA4L			Yes
DNM1			Yes
PCDHA6			Yes
RHOQ			Yes
KANSL1L			Yes
TMEM161A			Yes
UNC13A			Yes
CHD9			Yes
CAMTA2			Yes
ORC2			Yes
PTPRB			Yes
SEC23IP			Yes
PEX11B			Yes
FAM184A			Yes
SYNE1			Yes
TUT7			Yes
BIRC6			Yes
ALKBH8			Yes
FLNA			Yes
NECTIN2			Yes
SETD1B			Yes
ANK1			Yes
IL4I1			Yes
ANGPTL2			Yes
NAT9			Yes
ZIC4			Yes
TMEM260			Yes
ACP4			Yes
BPTF			Yes
ENTPD1			Yes
ZSCAN26			Yes
DNAH10			Yes
PMFBP1			Yes
TRIM26			Yes
MARK2			Yes
SIRT1			Yes
QRFPR			Yes
ASB8			Yes
COCH			Yes
ELL3			Yes
TSEN54			Yes
TIGD6			Yes
BTG2			Yes
MAP1B			Yes
ENPP5			Yes
POM121C			Yes
TP73			Yes
SMC1A			Yes
VPS54			Yes
STX1B			Yes
SPEN			Yes
SH3D19			Yes
ADGRB2			Yes
RABGAP1			Yes
TSC1			Yes
CIAO2A			Yes
EIF3E			Yes
PGLS			Yes
CYP7B1			Yes
DUSP26			Yes
GALNT15			Yes
NKX3-2			Yes
POLL			Yes
TMCC2			Yes
CAD			Yes
GGTLC2			Yes
PDCD10			Yes
SETD1A				Yes
CUL1				Yes
XPO7				Yes
TRIO				Yes
CACNA1G				Yes
SP4				Yes
HERC1				Yes
RB1CC1				Yes
AKAP11				Yes
ZNF136				Yes
SRRM2				Yes
ZMYM2				Yes
FAM120A				Yes
SLF2				Yes
DNM3				Yes
STAG1				Yes
H1-4				Yes
PREP				Yes
MAGEC1				Yes
MAGI2				Yes
DAGLA				Yes
OR4P4				Yes
SLC22A11				Yes
SV2A				Yes
PCLO				Yes
SOBP				Yes
BSCL2				Yes
ATP9A				Yes
FYN				Yes
CRAT				Yes
SCAF1				Yes
MPPED1				Yes
SLC34A2				Yes
ZNF318				Yes
CGREF1				Yes
POTEF				Yes
FABP7				Yes
TRAPPC10				Yes
PCNX3				Yes
HMGCR				Yes
CACNA2D1				Yes
SRPK1				Yes
OR2T8				Yes
ZMYND11				Yes
LMBR1L				Yes
KCNN3				Yes
SLITRK5				Yes
SLC25A43				Yes
S100P				Yes
RAB29				Yes
ABHD13				Yes
ZFC3H1				Yes
PUM2				Yes
IPMK				Yes
MACF1				Yes
OTUD4				Yes
CSPG5				Yes
UBE2E3				Yes
CRB1				Yes
ATP1A2				Yes
PROM1				Yes
TEFM				Yes
OMG				Yes
JAK3				Yes
TSC22D1				Yes
CHAF1B				Yes
CLPTM1				Yes
LZIC				Yes
BOD1L1				Yes
DCTN5				Yes
ZNF98				Yes
PSMA3				Yes
GAL3ST2				Yes
NAMPT				Yes
HIVEP2				Yes
GARIN1A				Yes
SLX4IP				Yes
PCDHAC1				Yes
DYNC2H1				Yes
ATF2				Yes
QRICH1				Yes
FBXO16				Yes
CHD5				Yes
TUBB8				Yes
RBM4				Yes
CRIPAK				Yes
C16orf87				Yes
PSMD11				Yes
MUC16				Yes

## Sheet: Supplementary Data File 2
Supplementary Data File 2: List of miRNAs enriched in temporal cluster I
miRNA (recognition motif)	Odds ratio of enrichment	FDR-corrected p-value	miRNA targets in temporal cluster I
MIR-493 (ATGTACA)	3.62593	0.000765122	NCOA1, PUM2, KDM5B, MED13L, SP4, SPEN, CREBBP, ARID1B, SIN3A, PHF12, PHF2, ZFC3H1, XPO7, MAP1B, MBD5, AXIN1, TBL1XR1
MIR-507 (GTGCAAA)	4.6012	0.0143031	NCOA1, SCN3A, DYRK1A, CHD9, BCL11A, MED13L, ANKRD12, TRAF7, TBL1XR1
MIR-141, MIR-200A (CAGTGTT)	3.02459	0.0143031	FOXP1, CHD9, IRF2BPL, MED13L, SIRT1, SP4, C16orf87, SOBP, ANKFY1, RABGAP1, MBD5, MECP2, MYT1L, TBL1XR1
MIR-320 (CAGCTTT)	3.13936	0.0225788	PLXNC1, TLK2, POGZ, SOBP, DSCAM, SMG7, CACNA1E, MECP2, TRAF7, CTNNB1, TBL1XR1, ABHD13
MIR-22 (GGCAGCT)	3.17544	0.0288775	FOXP1, CHD9, VEZF1, SIRT1, TLK2, TET2, DHX57, DSCAM, MECP2, DNM3, PTEN
MIR-105 (GCATTTG)	3.44432	0.0428714	NCOA1, SP4, LDB1, PHF12, MAP1B, MECP2, RB1CC1, GABRB3, TBL1XR1
MIR-198 (TCTGGAC)	4.78378	0.0428714	PUM2, ADNP, MED13L, POGZ, PHF12, PTEN
MIR-137 (AAGCAAT)	3.00327	0.0428714	DYRK1A, SRPK1, ZMYM2, SMC1A, CREBBP, ANKRD12, SOBP, ZFC3H1, RORB, SATB1
MIR-489 (ATGTCAC)	4.56634	0.0428714	NCOA1, SCN3A, BCL11A, SP4, BPTF, NSD1
MIR-485-3P (TGTATGA)	3.50185	0.0428714	PUM2, DYRK1A, GNAI1, RFX3, UBE2E3, VEZF1, SIRT1, OTUD4
MIR-186 (ATTCTTT)	2.70847	0.0428714	SRPK1, PSMD11, ZMYM2, SP4, SPAST, TCF20, MYT1L, RB1CC1, DNM3, OTUD4, TBL1XR1
MIR-147 (CCACACA)	5.31532	0.0428714	DNMT3A, CREBBP, DHX57, HDLBP, MECP2
MIR-410 (GTTATAT)	4.32084	0.0428714	DPYSL2, SP4, C16orf87, ANKRD12, RAI1, MACF1
MIR-452 (GAGACTG)	4.27487	0.0428714	DYRK1A, TCF4, TCF20, DHX57, LDB1, ZFC3H1
MIR-302C (ATGTTAA)	2.75609	0.0475418	FOXP1, VEZF1, BCL11A, SIRT1, SP4, ARID1B, ANKRD12, TBR1, RAI1, GABRB3
MIR-381 (CTTGTAT)	2.94028	0.0475418	STAG1, BCL11A, MED13L, ANKRD12, PHF2, BIRC6, XPO7, UBR1, SATB1
MIR-154, MIR-487 (GTATGAT)	4.78378	0.0493535	PUM2, DYRK1A, RFX3, DNMT3A, SIRT1

## Sheet: Supplementary Data File 3
Supplementary Data File 3: List of transcription factors enriched in temporal cluster I
Transcription factor (recognition motif)	Odds ratio of enrichment	FDR-corrected p-value	Transcription factor targets in temporal cluster I
LEF1 (CTTTGT)	1.90444	0.00382996	FOXP1, DPYSL2, PLXNC1, SCN3A, RFX3, FOXP2, UBE2E3, VEZF1, STAG1, DNMT3A, ADNP, BCL11A, SP4, TLK2, BPTF, ANKRD12, NSD1, TET2, DHX57, SMARCC2, LDB1, SOBP, ELAVL3, PHF12, LMBR1L, PHF21A, CHD2, XPO7, CUL1, MAP1B, CACNA1E, RORB, HERC1, DYNC1H1, RB1CC1, SATB1, FYN, PTK7, ADAMTS12, CTNNB1
YY1 (GCCATNTTG)	2.63321	0.037933	FOXP1, ALKBH8, ADNP, TCF4, TET2, ZNF318, TTI1, PHF12, CHD2, DSCAM, DYNC1H1, N4BP2L2
PAX4 (GGGTGGRR)	1.88266	0.0368682	DPYSL2, ATF2, DYRK1A, ZSWIM3, IRF2BPL, STAG1, ADNP, SP4, TCF4, SPEN, KIAA0586, POGZ, LDB1, ELAVL3, PHF12, XPO7, MAP1B, CACNA1E, TAOK1, DYNC1H1, FYN, ENTPD1, PTK7, ADAMTS12, GIGYF1, PNKP
FOXF2 (RTAAACA)	2.04359	0.0372294	ATF2, FOXP2, ADNP, BCL11A, TLK2, RBM4, TCF4, SPEN, TET2, SIN3A, SOBP, PHF12, LMBR1L, CHD2, ZMYND8, CAD, XPO7, RORB, FYN, TCF7L2
AHR (CCYCNRRSTNGCGTGASA)	7.3202	0.0269716	DPYSL2, ATF2, BCL11A, ELAVL3, ZFC3H1
AHR (KNNKNNTYGCGTGCMS)	5.3542	0.00957736	ZMYM2, VEZF1, BCL11A, SPEN, SOBP, PHF21A, SRRM2, TCF7L2
GTF3A (SNNNCCNCAGGCN)	3.45751	0.0269716	PLXNC1, ZMYM2, ALG10, DNMT3A, TLK2, LDB1, SOBP, HDLBP, MAP1B, PTK7
CEBPA (NTTRCNNAANNN)	3.15838	0.0404241	FOXP1, RBM4, ARID1B, TBR1, SOBP, CHD2, DYNC1H1, NAT9, PTEN
CEBPB (RNRTKDNGMAAKNN)	3.21865	0.037933	FOXP1, DYRK1A, SRPK1, FOXP2, ARID1B, TBR1, PHF21A, CHD2, ANKRD11
FOXC1 (NNNNNGTAAATAAACA)	3.37315	0.0368682	FOXP2, BCL11A, ARID1B, KIAA0586, QRICH1, POGZ, ZMYND8, XPO7, TCF7L2
NR3C1 (NNNNNNNGKACNNNNTGTTCTNNNNNN)	3.72929	0.0368682	PUM2, ADNP, NSD1, PHF21A, ZMYND8, MAP1B, UBR1, TBL1XR1
FOXA1 (TRTTTGYTYWN)	4.09363	0.0231343	FOXP1, PUM2, ALG10, FOXP2, TET2, POGZ, CHD2, ZMYND8, TCF7L2
IRF1 (SAAAAGYGAAACC)	3.37315	0.0368682	NCOA1, PLXNC1, BCL11A, TLK2, LDB1, PHF21A, RORB, AXIN1, PSMA3
IRF7 (TNSGAAWNCGAAANTNNN)	3.35971	0.0368682	PLXNC1, RFX3, FOXP2, LZIC, TLK2, SOBP, ZMYND8, POLL, PSMA3
MAZR (NSGGGGGGGGMCN)	4.68493	0.00382996	ATF2, ZMYM2, VEZF1, IRF2BPL, DNMT3A, TLK2, POGZ, PHF12, PHF21A, ENTPD1, TCF7L2
NFKB (NGGGGAMTTTCCNN)	3.7035	0.0231343	VEZF1, IRF2BPL, SPEN, NSD1, SIN3A, RAI1, SMG7, CACNA1E, SATB1, IL4I1
POU2F1 (NNGAATATKCANNNN)	3.51919	0.037933	FOXP1, DPYSL2, FOXP2, TCF4, TET2, TBR1, DSCAM, ENTPD1
PAX4 (RAAAAWTANNNNNNNNNNNNNNNYCACNCC)	4.2981	0.00957736	FOXP1, RFX3, ZMYM2, FOXP2, BCL11A, TCF4, QRICH1, SOBP, PHF21A, DSCAM
SOX5 (NNAACAATNN)	3.56268	0.0269716	RFX3, ZMYM2, FOXP2, BCL11A, TCF4, BPTF, LDB1, PHF21A, CTNNB1, TBL1XR1
SPZ1 (DNNGGRGGGWWNNNN)	3.65059	0.031488	DPYSL2, ZMYM2, ADNP, BCL11A, SP4, LDB1, PHF12, ZMYND8, XPO7
SRY (NWWAACAAWANN)	3.33315	0.0368682	ZMYM2, FOXP2, TCF4, LDB1, PHF21A, MAP1B, CACNA1E, SATB1, CTNNB1
TCF1 (GKCRGKTT)	3.5225	0.0269716	ZMYM2, ALG10, ADNP, SP4, TET2, LMBR1L, PHF21A, UBR1, TAOK1, SATB1
GTF2A1 (RGAGGKAGG)	3.65653	0.0368682	PTCH2, PLXNC1, BCL11A, SIN3A, LDB1, ELAVL3, ZMYND8, SMG7
TITF1 (WCTCAAGTGT)	3.54322	0.0365911	FOXP1, RFX3, PSMD11, TCF4, NSD1, POGZ, HERC1, SATB1, PTK7
VDR (GGGKNARNRRGGWSA)	3.76467	0.0269716	VEZF1, TBR1, SIN3A, POGZ, PHF12, CHD2, XPO7, SATB1, PTK7
YY1 (NNNNNCCATNTWNNNWN)	4.20687	0.00634267	SCN3A, FOXP2, STAG1, ADNP, TLK2, TCF4, BPTF, SOBP, PHF12, CHD2, SRRM2

## Sheet: Supplementary Data File 4
Supplementary Data File 4: Differential expression of 18 transcription factors (targeting genes in temporal cluster I) in autism patients (compiled using the BaseSpace Correlation Engine)
LEF1
Bioset name	P-value	Fold change
iPSCs from dental pulp cells (DPC) - idiopathic autism patients _vs_ control donors	0.0063	-1.92
Neural progenitor cells iPSC derived - autistic patients with BCKDK mutation _vs_ healthy controls	0.0046	5.13
iPSCs from dental pulp cells (DPC) - TRPC6 mutant non-syndromic autism patient _vs_ control donors	0.0038	-1.76
Brain samples frozen IVT assay - Autistic patients _vs_ healthy controls	0.0076	2.8
Whole blood of female autism patients with regression _vs_ normal controls	0.0278	1.29
iPSCs derived from fibroblasts - autistic patients with BCKDK mutation _vs_ healthy controls	0.0265	-2.21
Fibroblasts from autistic patients with BCKDK mutation _vs_ healthy controls	0.0275	2.49
Cerebellum of autistic patients _vs_ normal controls	0.0445	1.3
Blood - developmental delay with autistic features patients _vs_ healthy controls	0.0167	-1.5
Dental pulp cells (DPC) - TRPC6 mutant non-syndromic autism patient _vs_ control donors	0.0014	1.52
Neurons iPSC derived - autistic patients with BCKDK mutation _vs_ healthy controls	0.0276	1.76
VDR
Bioset name	P-value	Fold change
Whole blood of female autism patients with regression _vs_ normal controls	0.0134	1.46
iPSCs from skin fibroblasts of autistic donors _vs_ healthy controls	0.0154	1.4
Brain samples frozen DASL assay - Autistic patients _vs_ healthy controls	0.0056	1.91
Dental pulp cells (DPC) - idiopathic autism patients _vs_ control donors	0.0026	-2.28
Dental pulp cells (DPC) - TRPC6 mutant non-syndromic autism patient _vs_ control donors	0.0169	-1.79
Blood - developmental delay with autistic features patients _vs_ healthy controls	0.0431	-1.3
Neurons iPSC derived - autistic patients with BCKDK mutation _vs_ healthy controls	0.0489	-1.43
Neural progenitor cells iPSC derived - autistic patients with BCKDK mutation _vs_ healthy controls	0.0058	-2.05
YY1
Bioset name	P-value	Fold change
Whole blood of autism patients with no regression _vs_ normal controls	0.0073	1.42
Whole blood of male autism patients with no regression _vs_ normal controls	0.007	1.47
Whole blood of male autism patients with regression _vs_ normal controls	0.0186	1.23
Whole blood of autism patients with regression _vs_ normal controls	0.0215	1.2
Peripheral blood of Autism patients _vs_ healthy controls_GPL570	0.0001	1.36
Cerebellum of autistic patients _vs_ normal controls	0.0012	1.4
Blood - developmental delay with autistic features patients _vs_ healthy controls	0.0104	-1.53
AHR
Bioset name	P-value	Fold change
Neurons iPSC derived - autistic patients with BCKDK mutation _vs_ healthy controls	0.0085	3.91
Cerebellum of autistic patients _vs_ normal controls	0.0376	1.59
Lymphoblastoid cells - autism + mutation of FMR1_CHGN vs control males without autism	0.03	1.46
Dental pulp cells (DPC) - TRPC6 mutant non-syndromic autism patient _vs_ control donors	0.0002	2.45
iPSCs from dental pulp cells (DPC) - idiopathic autism patients _vs_ control donors	0.0061	-1.22
Peripheral blood of Autism patients _vs_ healthy controls_GPL570	0.0003	1.23
Brain samples FFPE DASL assay - Autistic patients _vs_ healthy controls	0.0489	-1.7
IRF7
Bioset name	P-value	Fold change
Brain samples frozen IVT assay - Autistic patients _vs_ healthy controls	0.004	2.86
Cerebral cortex of autism patients with downregulated RBFOX1 (A2BP1) _vs_ normal controls	5.7e-07	3.1582
Lymphoblastoid cells - autism + duplication of 15q11-13_CHGN vs control males without autism	0.0152	-1.38
Lymphoblastoid cells - autism + mutation of FMR1_CHGN vs control males without autism	0.0338	-1.44
Blood - developmental delay with autistic features patients _vs_ healthy controls	0.0179	-1.43
Brain samples frozen DASL assay - Autistic patients _vs_ healthy controls	0.0101	1.47
Neural progenitor cells iPSC derived - autistic patients with BCKDK mutation _vs_ healthy controls	0.0181	-1.84
IRF1
Bioset name	P-value	Fold change
Brain samples frozen IVT assay - Autistic patients _vs_ healthy controls	0.0115	1.91
iPSCs derived from fibroblasts - autistic patients with BCKDK mutation _vs_ healthy controls	0.0356	1.7
Lymphoblastoid cells - autism + mutation of FMR1_CHGN vs control males without autism	0.0008	-1.21
Neural progenitor cells iPSC derived - autistic patients with BCKDK mutation _vs_ healthy controls	0.0081	-3.41
Cerebral cortex of autism patients with downregulated RBFOX1 (A2BP1) _vs_ normal controls	2.1e-05	2.2299
Dental pulp cells (DPC) - TRPC6 mutant non-syndromic autism patient _vs_ control donors	0.0004	1.55
Blood - developmental delay with autistic features patients _vs_ healthy controls	0.0336	-1.22
NR3C1
Bioset name	P-value	Fold change
Lymphoblastoid cells - autism + duplication of 15q11-13_CHGN vs control males without autism	0.0009	1.49
Lymphoblastoid cells - autism + mutation of FMR1_CHGN vs control males without autism	1.5e-06	1.47
Neurons iPSC derived - autistic patients with BCKDK mutation _vs_ healthy controls	0.0196	2.42
Peripheral blood of Autism patients _vs_ healthy controls_GPL570	0.0009	1.32
Neural progenitor cells iPSC derived - autistic patients with BCKDK mutation _vs_ healthy controls	0.0108	3.24
Dental pulp cells (DPC) - idiopathic autism patients _vs_ control donors	0.0199	-1.63
SOX5
Bioset name	P-value	Fold change
Whole blood of female autism patients with no regression _vs_ normal controls	0.0179	-1.39
Whole blood of female autism patients with regression _vs_ normal controls	0.0231	-1.26
iPSCs derived from fibroblasts - autistic patients with BCKDK mutation _vs_ healthy controls	0.0004	-1.97
Blood - developmental delay with autistic features patients _vs_ healthy controls	0.0259	1.42
Brain samples FFPE DASL assay - Autistic patients _vs_ healthy controls	0.0164	-2.17
FOXC1
Bioset name	P-value	Fold change
Neurons iPSC derived - autistic patients with BCKDK mutation _vs_ healthy controls	0.0057	4.53
Cerebellum of autistic patients _vs_ normal controls	0.0228	1.47
Neural progenitor cells iPSC derived - autistic patients with BCKDK mutation _vs_ healthy controls	0.047	2.21
Dental pulp cells (DPC) - TRPC6 mutant non-syndromic autism patient _vs_ control donors	0.0001	-1.3
POU2F1
Bioset name	P-value	Fold change
Cerebellum of autistic patients _vs_ normal controls	0.0165	1.5
iPSCs derived from fibroblasts - autistic patients with BCKDK mutation _vs_ healthy controls	0.0437	-1.29
Fibroblasts from autistic patients with BCKDK mutation _vs_ healthy controls	0.0275	1.68
Dental pulp cells (DPC) - TRPC6 mutant non-syndromic autism patient _vs_ control donors	0.0129	-1.47
CEBPA
Bioset name	P-value	Fold change
iPSCs derived from fibroblasts - autistic patients with BCKDK mutation _vs_ healthy controls	0.0064	3.3
Blood - developmental delay with autistic features patients _vs_ healthy controls	0.0101	-1.47
Neural progenitor cells iPSC derived - autistic patients with BCKDK mutation _vs_ healthy controls	0.0005	-2.23
FOXF2
Bioset name	P-value	Fold change
Brain samples frozen IVT assay - Autistic patients _vs_ healthy controls	0.0078	2.42
Dental pulp cells (DPC) - TRPC6 mutant non-syndromic autism patient _vs_ control donors	0.0004	-1.58
Neural progenitor cells iPSC derived - autistic patients with BCKDK mutation _vs_ healthy controls	0.0004	-1.85
GTF2A1
Bioset name	P-value	Fold change
Blood - developmental delay with autistic features patients _vs_ healthy controls	0.0036	-1.22
Dental pulp cells (DPC) - idiopathic autism patients _vs_ control donors	0.0013	-1.65
Dental pulp cells (DPC) - TRPC6 mutant non-syndromic autism patient _vs_ control donors	0.0203	-1.34
CEBPB
Bioset name	P-value	Fold change
Cerebellum of autistic patients _vs_ normal controls	0.0004	1.67
Lymphoblastoid cells - autism + mutation of FMR1_CHGN vs control males without autism	0.0065	-1.36
PAX4
Bioset name	P-value	Fold change
Neural progenitor cells iPSC derived - autistic patients with BCKDK mutation _vs_ healthy controls	0.0017	-3.69
Neurons iPSC derived - autistic patients with BCKDK mutation _vs_ healthy controls	0.043	-1.63
SPZ1
Bioset name	P-value	Fold change
Neurons iPSC derived - autistic patients with BCKDK mutation _vs_ healthy controls	0.0067	-1.78
SRY
Bioset name	P-value	Fold change
Neural progenitor cells iPSC derived - autistic patients with BCKDK mutation _vs_ healthy controls	0.0487	-2.3
GTF3A
Bioset name	P-value	Fold change
Dental pulp cells (DPC) - idiopathic autism patients _vs_ control donors	0.0079	-1.57
